# Supplementary material for: A SHERLOCK toolbox for eco-epidemiological surveillance of African trypanosomes in domestic pigs from Western Africa
Source: eLife. 2025 Sep 22;14:RP106823. doi: 10.7554/eLife.106823 (PMC12453586; doi:10.7554/eLife.106823)
Supplement: Figure 1—figure supplement 3—source data 1. [file elife-106823-fig1-figsupp3-data1.xlsx]

## Sheet: Sheet1
18S pan-trypanosomatid SHERLOCK
Time (min)	20									120
RPA Primers	A
crRNA	1			2			3			1			2			3
Tbb RNA	11.11	10.3	9.25	10.71	8.52	7.46	23.03	21.21	19.63	26.33	20.48	21.96	34.15	23.67	26.54	24.85	20.05	22.18
HEK RNA	1.01	1.01	0.97	1.03	1.03	0.97	1.1	0.96	0.98	1.09	1.11	1.03	1.3	1.32	1.2	0.86	0.74	0.85
18S pan-Trypanozoon SHERLOCK
Time (min)	120
RPA Primers	A						B						C
crRNA	1			2			1			2			1			2
Tbb RNA	14.98	16.5	15.46	1.34	1.34	1.47	19.97	20.65	21.2	2.04	2.14	2.32	19.15	19.96	20.91	3.13	3.17	3.34
HEK RNA	5.01	8.05	5.85	0.57	0.78	0.57	6.7	7	6.79	0.74	0.67	0.62	10.63	10.95	10.87	1.06	1.08	1.11
IFX T. vivax-specific SHERLOCK
Time (min)	30
RPA Primers	A																											B
crRNA	1									2									3									4									5									6
Tvx RNA	8.73	7.71	9.01	1.56	2.48	2.48	1.29	1.13	1.13	1.05	1.04	1.01	1.14	1.05	1.1	1.12	1.06	0.91	29.4	32.56	21.38	6.72	7.51	5.77	1.15	1.22	1.02	13.18	12.33	12.18	43.07	41.25	37.93	22.85	26.27	23.84	35.64	32.83	32.97	42.5	42.49	40.79	26.04	24.93	24.28	28.15	29.03	28.11	33.71
Tbb RNA	1.43	1.25	1.09	1	0.82	0.75	1.25	1.09	0.93	0.96	0.96	0.96	1.03	0.91	0.97	1.02	0.99	0.88	0.96	1.13	1.02	0.97	1.06	0.98	0.9	1.16	0.97	1.16	1.09	1.22	1.16	1.08	1.18	1.06	1.12	1.12	1.09	1.09	1.05	1.08	1.02	1.08	0.97	0.94	0.92	0.89	0.97	0.87	1.03
18S T. congolense-specific SHERLOCK
Time (min)	120
RPA Primers	A
crRNA	1															2									3									4									5
Tcg RNA	11.41	10.15	10.48	7.93	7.23	7.5	9.13	8.23	8.54	5.7	5.65	5.49	8.96	8.34	7.88	10.21	9.1	9.56	6.96	5.73	7.77	11	9.65	9.13	37.97	33.26	34.48	33.81	32.14	33.32	29.39	26.68	27.53	1.34	0.99	1.05	1.02	1.11	0.95	0.99	0.83	0.95	5.87	3.97	2.86	4.63	3.56	4.04	2.08
Tbb RNA	0.97	0.91	0.68	0.9	0.8	0.72	1.26	1.08	0.93	0.98	1.01	0.98	0.87	0.96	0.87	0.94	0.91	0.9	1.03	0.93	1.02	0.85	0.92	0.94	34.71	31.07	29.15	25.35	22.89	21.25	21.66	19.81	19.46	1.22	1.13	1.03	1.09	1.03	0.99	0.96	0.9	0.87	1.1	0.91	0.94	0.98	0.96	0.95	1
18S T. theileri-specific SHERLOCK
Time (min)	120
RPA Primers	A
crRNA	1			2
Tth RNA	14.98	16.5	15.46	1.34	1.34	1.47
Tbg RNA	5.01	8.05	5.85	0.57	0.78	0.57
[truncated: 59 more columns]
