# Supplementary material for: A SHERLOCK toolbox for eco-epidemiological surveillance of African trypanosomes in domestic pigs from Western Africa
Source: eLife. 2025 Sep 22;14:RP106823. doi: 10.7554/eLife.106823 (PMC12453586; doi:10.7554/eLife.106823)
Supplement: Figure 1—source data 1. [file elife-106823-fig1-data1.xlsx]

## Sheet: Sheet1
	Tbb									Tbg									Tbr									TevA									TevB									Teq
18S pan-trypanosomatid SHERLOCK	18.31	18.33	17.71	20.55	20.35	20.96	23.58	22.27	23.33	17.57	14.68	14.61	19.31	15.01	17.6	20.97	19.14	20.05	17.87	18.38	18.65	19.83	19.85	21.17	22.43	20.91	22.51	18.81	18.33	17.81	19.34	18.37	18.93	20.37	20.48	20.95	17.59	16.79	17.89	18.79	18.5	19.97	19.42	18.97	20.04	16.2	16.92	16.5	19.15
18S pan-Trypanozoon SHERLOCK	14.59	14.59	15.04	15.7	15.85	15.52	27.85	26.5	28.18	15.01	14.06	14.71	15.92	15.45	15.85	26.38	24.98	26.85	13.93	13.51	13.97	15.14	14.36	15.63	24.62	26.84	20.71	14.29	14.21	14.59	15.26	14.83	15.17	29.34	27.56	28.59	14.06	13.43	14.23	15.71	15.53	15.67	27.47	26.45	28.16	13.99	12.76	13.73	15.53
[truncated: 56 more columns]
