# Supplementary material for: A SHERLOCK toolbox for eco-epidemiological surveillance of African trypanosomes in domestic pigs from Western Africa
Source: eLife. 2025 Sep 22;14:RP106823. doi: 10.7554/eLife.106823 (PMC12453586; doi:10.7554/eLife.106823)
Supplement: Figure 1—source data 2. [file elife-106823-fig1-data2.xlsx]

## Sheet: Sheet1
	T.congolense			T.vivax			T.theileri			T.simiae			T.suis
Tbb	0.891336	0.819383	0.961821	0.851161	1.01575	1.14686	0.901818	0.963636	0.810909	0.81893	0.806584	0.765432	0.774245	0.927277	0.811247
Tbg	0.825257	0.69163	0.737151	1.04961	0.980415	0.982673	0.727273	0.727273	0.632727	0.880658	0.91358	1.04527	0.824931	1.24268	0.702981
Tcg	9.49633	8.91189	9.23935	1.02959	0.944316	1.07838	0.607273	0.905455	0.781818	0.814815	0.8107	0.790123	0.799285	0.887471	0.951177
Tvx	0.807636	0.299559	0.301028	15.6407	14.0212	13.3394	0.814545	0.76	0.756364	0.716049	0.82716	0.72428	0.79531	1.03036	0.890148
Tth	2.18649	1.50367	0.881057	1.11971	0.712366	0.765264	23.2727	23.1491	23.5418	1.04527	0.63786	0.950617	0.705485	0.853789	0.721447
Tsm	0.405286	0.422907	0.488987	1.33773	0.844854	1.44761	0.967273	0.796364	1.00364	22.2435	23.7966	20.265	0.829259	1.08642	0.865308
Tsu	0.92674	0.666667	0.681319	1.18662	0.757296	1.24752	0.901818	0.963636	0.810909	0.727273	0.727273	0.632727	14.3752	12.5037	10.755
