# Supplementary material for: A SHERLOCK toolbox for eco-epidemiological surveillance of African trypanosomes in domestic pigs from Western Africa
Source: eLife. 2025 Sep 22;14:RP106823. doi: 10.7554/eLife.106823 (PMC12453586; doi:10.7554/eLife.106823)
Supplement: Figure 2—figure supplement 1—source data 1. [file elife-106823-fig2-figsupp1-data1.xlsx]

## Sheet: Sheet1
Pig blood extraction	Tbb extraction	18S Pan-trypanosomatid			18S Pan-Trypanozoon
(+++)	(-)	1.14311	1.65083	1.49076	0.924875	1.04475	0.391986
(+++)	(+)	16.9284	22.7482	20.386	12.0083	15.7263	10.5871
(+++)	(++)	17.5044	24.3302	21.1828	14.3639	14.5318	14.6585
(++)	(+++)	17.6387	23.3492	20.2834	13.8798	14.7194	14.2422
(+)	(+++)	17.7574	24.1425	20.3388	15.4491	16.1721	16.1202
(-)	(+++)	16.719	23.2423	20.2177	16.1135	16.2203	16.4251
