# Supplementary material for: A SHERLOCK toolbox for eco-epidemiological surveillance of African trypanosomes in domestic pigs from Western Africa
Source: eLife. 2025 Sep 22;14:RP106823. doi: 10.7554/eLife.106823 (PMC12453586; doi:10.7554/eLife.106823)
Supplement: Figure 2—figure supplement 2—source data 1. [file elife-106823-fig2-figsupp2-data1.xlsx]

## Sheet: Sheet1
18S Pan-trypanosomatid		18S Pan-Trypanozoon			18S T. congolense-specific		IFX T. vivax-specific		18S T. theileri-specific		18S T. simiae-specific		GAPDH T. simiae-specific
Positive	Negative	Positive	Negative		Positive	Negative	Positive	Negative	Positive	Negative	Positive	Negative	Positive	Negative
17.6	1.16	24.5421	0.953425		5.87	0.72	22.81	1.18	18.535	0.920308	6.99469	1.16834	20.686	1.05922
16.62	1.07	18.8873	0.913973		4.66	0.91	21.1	1.21	31.113	0.971722	4.07692	0.870603	30.8346	1.10998
17.62	1.16	23.7465	1.63434		3.52	1.44	21.81	1.11	23.77	0.802057	7.12732	1.07789	35.6762	1.1456
16.94	1.12	21.6709	1.36402		5.65	0.62	21.82	0.92	29.561	0.987147	12.3323	1.09673	14.3752	0.824931
16.17	1.06	18.1728	1.56274		5.24	0.8	18.73	1.06	29.471	0.66581	13.1003	1.09296	12.5037	1.24268
16.83	1.17	22.9595	0.877443		2.89	1.1	17.23	1.02	36.105	0.717857	11.8527	1.03266	10.755	0.702981
16.27	1.13	19.728	2.30277		4.7	0.59	19.83	1.17	40.966	0.908036	8.83429	1.14573	11.4591	0.774245
15.57	0.76	20.4645	2.15126		5.21	0.78	15.66	0.93	38.088	0.835714	7.58571	0.972362	12.5563	0.927277
18.12	1.21	18.5767	0.675901		3.22	0.98	13.35	1.08	37.874	0.883234	8.01714	1.26633	12.4996	0.811247
18.08	1	17.3372	0.924875		4.9	0.77	15.3	1.06	34.783	1.06886	5.76723	1.20603	11.7356	0.79531
17.42	1.03	22.8771	1.04475		2.67	0.77	19.59	1.04	19.27	0.745509	2.88567	1.07412	14.0449	1.03036
17.64	0.94	22.0649	0.391986		5.65	1.28	20.91	0.95	30.817	0.765896	2.80831	0.930905	10.5984	0.890148
18.14	1.1	20.6088	0.77		2.81	0.74	20.1	0.97	24.195	0.971098	16.8162	1.01061	12.9841	0.799285
16.92	0.99	18.4506	0.72		5.44	0.78	20.93	0.35	29.453	0.754335	8.35092	0.901857	14.2388	0.887471
17.15	0.95	17.5727	0.74		3	1.14	15.87	0.94	28.608	1.04113	38.5552	1.02122	11.8374	0.951177
17.18	1.1	19.1907	0.73		7.3	0.64	8.64	1.01	34.852	0.870536	30.8373	0.870027	10.3561	0.705485
16.86	1	11.7003	0.68		7.32	0.71	17.35	1.1	40.207	1.13304	31.8623	0.909814	13.208	0.853789
17.76	1.06	9.30879	0.71		5.25	1.32	14.72	1.12	38.954	0.996429	26.8562	0.98939	10.2402	0.721447
18.54	4.94	12.5264	1.02		2.47	0.71	11.33	1.03	39.163	1.11628	22.2435	0.912467	8.80246	0.829259
18.05	4.83	19.6379	0.98		7.05	0.89	15.69	1.06	34.508	0.90407	23.7966	0.729443	16.8905	1.08642
17.21	4.18	19.8073	0.99		7.34	1.3	22.31	1.04	18.509	0.979651	20.265	0.98939	12.7023	0.865308
17.33	3.89	18.4153	0.72		6.21	0.65	23.02	0.98	32.282	1.00299	25.8684	0.984326	10.5477	0.827719
16.61	4.49	3.83697	0.76		2.36	0.86	22.98	0.98	24.48	1.07485	7.13816	0.742947	12.9712	1.25
16.18	3.67	3.97107	0.72		6.93	1.16	18.07	1.02	29.276	0.922156	13.5263	0.896552	13.1094	0.734603
16.64	1.57	3.77323	0.76		7.49	0.58	17.27	1.13	30.209	1.0617	22.2435	0.981191	9.9368
16.02	2.77	12.0083	0.79		5.55	0.79	16.05	0.99	34.613	0.881748	23.7966	1.13793	11.8872
16.7	1.72	15.7263	0.8		2.11	1	18.61	0.78	40.375	0.92545	20.265	1.05643	12.4974
17.47	1.03	10.5871	0.93		5.81	0.91	13.21	0.82	38.837	1.07411	37.75	0.971787	3.96701
16.94	0.98	14.3639	0.9		5.8	1.04	12.09	1.04	40.085	1.36607	21.8289	0.962382	5.52998
16.89	0.92	14.5318	0.98		3.17	1.21	15.16	0.88	32.292	0.958929	31.8618	0.978056	5.56975
17.19	1.15	14.6585	1.18		4.57	0.82	17.69	1.03	21.339	1.01796	23.9569	0.902821
16.58	0.92	13.8798	1.05		5.8	1.1	17.47	0.73	19.265	0.907186	25.5532	0.874608
16.9	1.01	14.7194	1.28		3.08	0.82	2.21	1.04	19.797	0.847305	21.8428	1.05643
14.05	1.04	14.2422	1.15		3.6	0.73	18.13	0.57	20.563	1.21965	38.6908	1.13714
13.8	0.94	15.4491	1.06		5.96	0.92	17.16	0.89	23.989	1.23699	22.2105	1.00286
14.61	0.9	16.1721	1.29		3.21	0.92	1.9	0.92	20.491	1.04913	31.5526	0.937143
6.53	1.24	16.1202	0.83		4.19	0.96	18.23	1.09	32.239	1.33419	25.8428	1.10857
6.18	0.78	16.1135	0.8		3.61	1	16.51	0.93	22.008	1.24679	25.1433	1.06
5.67	1.11	16.2203	0.84		3.08	0.94	1.62	0.84	23.641	1.24679	22.8752	1.04286
11.44	1.07	16.4251	1.03		1.94	0.81	15.13	0.94	31.382	1.29107	37.9737	1.10286
10.1	0.95	13.99	1.09		3.64	1.18	10.46	1.17	21.941	1.2375	17.0724	0.911429
10.74	0.94	13.99	1.03		3.83	1.13	14.9	1.03	23.173	1.13036	27.5724	0.96
4.46	1.1	14.69	1.18		2.73	0.52	11.08	1.09	27.932	0.888041	25.7319	1.02
4.25	0.87	15.07	1.07		1.9	0.93	15.89	0.92	20.939	1.10687	25.2481	0.808571
4.84	1.07	14.9	1.2		3.77	0.83	12.81	1.14	17.739	1.05598	22.3205	0.98
5.95	3.11	14.94	0.93		3.63	0.83	2.21	0.57	26.295	0.949109	36.0526	0.759242
5.96	3.04	26.34	0.88		3.26	0.98	2.13	1	31.763	1.47074	14.2434	0.74555
5.82	2.57	24.88	0.94		1.8	0.93	1.68	0.95	18.5349	0.982188	26.6711	1.24874
6.1	3.43	26.9	0.98		6.72	0.99	2.13	0.98	31.1134	1.41476	24.2989	1.01187
5.94	3.31	14.96	0.93		6.69	1.09	2.48	1.08	23.7703	1.04835	24.6225	1.40621
6.03	2.66	13.78	1.12		6.45	1.17	1.87	1	29.561	0.83715	16.3544	1.00833
10.59	2.6	14.4	1.11		6.89	0.81	9.36	0.86	29.4709	0.987277	27.0263	0.991671
9.84	2.67	15.5	1.02		6.76	0.9	11.81	0.99	36.1047	0.824427	3.375	0.81893
10.28	1.75	15.15	1.31		6.2	0.92	8.52	0.95	40.966	0.798982	8.23026	0.806584
2.08	1.26	15.58	0.8		7.01	1.01	16.13	1.03	38.0883	1.07673	15.9445	0.765432
2.07	0.87	25.65	0.77		7.25	0.87	15.84	1.09	37.8744	0.923267	16.379	0.880658
1.96	0.86	24.51	0.81		6.95	0.92	15.31	1.02	34.7827	1.13861	4.68105	0.91358
5.15	1.17	26.58	5.01		7.31	1.14	16.61	1.02	19.2703	0.985149	21.9605	1.04527
5.46	1.03	13.35	8.05		7.63	1.07	17.85	1.01	30.8169	0.774752	2.46711	0.814815
6.08	0.72	13.09	5.85		7.03	1.09	17.03	0.97	24.1948	1.08911	5.10526	0.8107
2.68	1.03	13.21	0.96		6.31	1.03	17.1	1.07	29.4535	0.868812	18.5886	0.790123
2.36	1.01	14.77	0.91		6.08	0.92	17.86	0.96	28.6076	1.37376	18.1541	0.716049
2.6	0.95	13.87	0.95		5.29	0.98	14.16	0.97	34.8517	0.905941	5.54391	0.82716
1.32	1.26	14.54	1.11		6.15	1.06	16.9	1.04	40.2071	0.834158	14.8224	0.72428
1.3	1.02	23.53	1.06		6.19	0.99	16.45	1.04	38.9542	0.789818	1.64474	1.04527
1.55	0.95	25.66	1.16		5.24	1.03	16.27	0.92	39.163	1.02397	3.41447	0.63786
1.87	0.99	19.38	0.85		7.84	0.981432	16.68	1.03	34.5076	1.46791	14.9091	0.950617
1.97	0.98	13.02	0.75		7.67	1.00672	16.77	1	18.5087	0.837361	11.7874	0.727273
22.17	0.94	12.77	0.82		7.51	0.787564	15.19	0.97	32.282	0.742274	4.48382	0.727273
23.01	1	13.04	0.97		2.98	0.928033	16.21	1.01	24.4797	0.981775	8.34868	0.632727
21.84	1.03	13.81	1		3	1.07197	15.48	1	29.2762	1.16363	1.44737	1.44737
21.74	1.07	13.32	0.96		2.78	0.754626	15.71	0.99	30.2093	0.862916	2.01316	0.888158
21.85	1.03	13.51	1.16		2.39	0.968472	16.58	1.02	34.6134	0.724445	5.09091	0.940789
21.29	0.98	26.32	1.03		2.36	1.03461	16.61	1	40.3752	1.02575	4.13251	1.0077
25.14	0.92	25.12	1.2		2.31	0.821453	15.39	0.98	38.837	0.803058	1.65794	1.22034
25.24	1.15	25.68	0.96		15.052	1.20528	14.18	1.04	40.0849	0.870835	5.76723	0.828968
23.53	0.92	12.36	0.83		9.27633	1.0049	15.14	1.01	32.292	1.32611	2.88567	0.766749
24.6	1.01	12.04	0.96		12.7997	1.04809	15.44	0.95	21.3393	1.00707	2.80831	1.08768
24.95	1.04	12.47	0.95441		15.1803	0.747551	15.27	1	19.2648	1.44181	17.4748	1.24897
24.27	0.94	14.16	0.74331		10.0712	1.19947	16.08	1.02	19.7969	0.901818	4.36725	0.770885
24.13	0.9	13.64	1.00496		14.1825	1.0748	9.62	0.98	20.5634	0.963636	7.71712	0.79818
23.07	1.24	13.69	3.05		11.39	0.650045	14.01	0.98	23.9893	0.810909	5.34739	1.0579
23.17	0.78	24.23	2.42		10	1.0374	14.6	0.94	20.4911	0.727273	18.1778	1.36476
26.65	1.11	23.51	2.66		10.35	1.23954	14.42	1.22	32.2392	0.727273	5.69644	0.846981
25.63	1.07	25.05	3.86		7.74	0.772039	14.97	0.83	22.0076	0.632727	16.5678	0.837055
24.76	0.95	12.77	2.04		7.04	1.1919	15.88	0.91	23.6412	0.607273	4.57793	0.909843
25.33	0.94	11.54	5.02		7.37	1.90561	12.8	1	31.3817	0.905455	6.95174	1.01537
21.62	1.1	12.8	0.81		9.42	1.21683	14.14	0.94	21.9415	0.781818	43.6197	1.0458
21.52	0.87	14.1	0.87		8.36	0.983526	14.69	1.07	23.173	0.814545	24.144	0.938826
22.93	1.07	14.06	0.88		9.13	1.13535	14.73	1.14	27.9319	0.76	22.4982	0.961881
15.11	0.94	14.35	5.01		5.81	1.07	14.69	1.1506	20.9394	0.756364	21.3061	0.887181
20.15	0.93	25.52	8.05		3.6	0.94	15.14	0.849401	17.7385	0.967273	25.3412	0.670551
28.73	0.94	24.57	5.85		4.57	0.68	13.44	1.79206	26.2946	0.796364	20.1057	1.22196
24.28	0.97	25.95	2.6		5.8	0.92	11.24	1.64524	31.7633	1.00364	18.5805	0.793199
26.33	1.06	14.98	4.99		5.96	0.81	11.31	1.26087	19.5149	0.901818	29.7851	0.959746
23.64	0.92	16.5	9.65		5.8	0.73	11.06	1.0189	27.7339	0.963636	19.8364	1.00354
21.7	1.18	15.46	1.18038		3.17	1.3	12.27	1.74669	20.8624	0.810909	29.679	0.742647
22.84	1.12	36.05	0.924678		3.21	1.12	13.09	1.04005	24.0507	0.89181	28.5325	1.05826
20.93	0.94	34.37	1.09415		3.08	1.02	11.23	0.790202	23.1491	1.07685	25.1994	1.16647
20.06	1.95	33.89	0.989011			1.22	11.02	1.00968	23.2727	1.03134	26.6494	0.823529
19.67	1.12	34.84	0.96337			0.97	10.62	1.16007	23.5418	1.03219	19.7438	0.990466
21.98	1.9	34.39	1.05861			0.77	12.2	0.669198	36.8929	0.915649	31.4688	1.05903
21.68	1.12	34.86				1.14	12.62	1.27079	20.4897	1.05216	30.2839	0.852941
20.93	0.9	35.69				0.96	13.71	1.29822	27.0317	0.933566	28.7603	0.96822
20.87	1.12	33.6				0.77	11.16	1.16693	23.8944	1.10839	20.6737	1.34947
19.73	1.26	34.35				1.32	11.24	0.768157	25.731	0.958042	27.286	0.903493
18.46	0.87	26.29				1.14	10.67	1.23111	21.1198	1.05946	30.5632	0.954449
23.12	0.86	26.33				0.86	12.03	1.51525	19.6016	0.872973	22.3575	1.10508
22.7	1.17	26.88				1.15	12.63	0.94109	17.9666	1.06757	10.7193	0.962316
22.55	1.03	25.02				0.89	12.68	1.44323	18.8251	0.789818	24.5372
18.97	0.72	22.82				0.58	10.72	1.33203	21.9656	1.02397	12.3989
20.27	1.03	25.54				1.08	15.93	1.01	21.8324	1.46791	5.64062
16.9	1.01	28.47				0.91	16.42	0.93	14.394	0.837361	5.68015
7.27	0.95	28.02				0.67	15.18	1.06	19.9141	0.742274	6.13143
9.21	1.26	28.7				1.14	17.45	1.06	23.6845	0.981775
8.18	1.02	25.51				1.03	17.38	0.99	20.2477	1.16363
22.13	0.95	24.69				0.67	14.62	1.13	16.3618	0.862916
21.75	0.99	27.51				0.91	14.43	0.97	15.4495	0.724445
18.38	0.98	26.42				0.82	15.63	0.89	7.61487	1.02575
15.34	0.94	24.94				0.73	16.36	1	21.182	0.803058
11.34	1	29				1.1	16.6	1.05	11.2356	0.870835
10.35	1.03	25.87				0.92	17.12	0.96	16.1982	1.32611
21.94	1.07	25.57				1.04	16.26	0.95	21.7192	1.00707
20.3	0.79	28.4				1.21	15.42	1.09	18.596	1.44181
19.94	1.23					0.82	15.97	1.08	12.1465	1.0617
13.92	0.77					0.92	16.71	1.1	20.3296	0.881748
8.76	1.44						17.73	1.1	20.2295	0.92545
7.62	0.8						16.73	1.04	19.8413	1.33419
19.46	0.996798						16.01	1.02	21.6459	1.24679
19.42	1.14163						12.22	0.97	21.7059	1.24679
18.72	1.22069						13.83	0.77	20.9134	1.07411
17.95	0.968719						14.06	0.94	20.3418	1.36607
17.58	0.810591						13.3	0.87	16.908	0.958929
16.98	0.93						16.14	0.79	17.4479	1.29107
19.06	0.76						15.13	0.84	21.6559	1.2375
20.08	0.87						12.87	0.91	20.9667	1.13036
19.07	1.05						13.12	0.8	19.7947	1.09124
22.16	1.08						13.97	0.85	20.6148	0.952555
12.59	0.95						14.8		21.816	0.956204
12.87	0.83						14.97		20.912	1.149
19.79	0.98						13.56		21.1698	0.768101
16.89	0.98						13.21		22.8812	1.0829
14.7	1.05						13.78		21.3729	0.989933
13.99	0.95						13.79		19.0222	0.983221
10.8	0.99						15.4		20.0779	1.02685
15.31	0.93						15.17		18.7401	0.992606
17.91	0.98						13.51		19.7814	0.959335
18.06	0.95						11.38		20.6903	1.04806
18.82	0.97						12.08		19.2752	1.00299
20.18	0.98						13.24		15.6643	1.07485
18.76	1.03						14.26		14.2692	0.922156
17.12	1.22						14.99		14.6469	0.988439
19.71	0.97						14.77		16.373	1
19.34	0.99						12.51		15.1865	1.01156
18.68	0.98						12.61		16.0973	0.964072
19.99	0.99						13.71		27.9319	1.31437
17.72	0.91						13.68		20.9394	0.889222
16.3	0.93						14.83		17.7385	1.1185
19.83	1.41						14.73		26.2946	1.06936
18.76	1.47						12.5		31.7633	0.939306
17.95	1.56						14.05		19.5149	0.883234
20.39	0.93						13.89		27.7339	1.06886
19.25	0.96						14.12		20.8624	0.745509
20.09	0.93						13.93		24.0507	0.765896
18.7	1.04						14.56		21.3393	0.971098
17.88	0.98						14.89		19.2648	0.754335
16.6	1.06						16.26		19.7969	1.01796
20.95	1.19						16.77		20.5634	0.907186
17.68	1.36						16.91		23.9893	0.847305
19.34	1.2						18.16		20.4911	1.21965
17.92	0.95						14.29		22.9088	1.23699
16.95	0.99						14.26		22.9781	1.04913
15.05	0.93						14.63		23.4526	0.74012
20.85	0.98						15.04		16.0609	1.00936
19.4	0.95						15.69		14.8993	1.11278
19.9	0.97						15.99		8.09654	0.751676
6.9	0.98						13.19		22.7993	0.782297
10.19	1.03						15.96		24.8796	0.933672
6.8	1.22						17.01		24.2993	1.60966
9.06	1.01						16.77		17.6663	0.825052
7.05	1						17.24		18.5383	0.755142
5.17	1.01						18.53		19.7566	1.01918
22.17	1.02						14.2		23.2372	0.982201
23.01	0.99						16.2		23.4197	1.02958
21.84	1.01						16.68		24.6715	0.988218
21.74	1.07						11.72		18.3337	0.92354
21.85	1						17.62		17.7733	0.894209
21.29	0.9						18.69		11.1941
25.14	0.99						17.38		24.5036
25.24	0.97						15.15		24.3832
23.53	0.99						16.27		25.1277
24.6	1.06						11.23		19.6306
24.95	1.01						16.86		19.958
24.27	0.96						16.86		19.6023
24.13	1.27513						14.25		24.6533
23.07	0.857048						15.13		22.7299
23.17	0.985894						15.96		23.7263
26.65	0.881928						11.64		20.7482
25.63	1.07031						16.71		18.6548
24.76	1.373						18.51		20.2634
25.33	1.503						15.12		23.7226
21.62	0.588						12.18		24.1679
21.52	0.536						10.27		24.6204
22.93	0.631						15.43		20.8709
15.11	0.607						8.91		19.7692
20.15	1.244						10.85		19.8321
28.73	0.72						11.28		23.1679
24.28	1.534						14.39		14.0401
26.33	0.826						11.1		21.6058
23.64	0.924						9.73		16.7188
21.7	0.717						12.58		7.76285
22.84	0.946						15.4		16.9706
20.93	1.021						10.03		17.8087
20.06	1.922						19.2735		8.61409
19.67	1.07						20.7976		12.3893
21.98	1.19367						21.2865		23.4455
21.68	1.19367						23.07		22.0203
20.93	1.19367						22.66		22.597
20.87	1.15733						22.89		2.4094
19.73	0.827586						26.03		2
18.46	1.01509						26.72		2.03356
23.12	0.933382						26.52		12.305
22.7	0.979502						24.26		7.38909
22.55	1.08712						24.04		12.3466
18.97	1.02439						24.37		2.7994
20.27	0.920411								4.11377
16.9	1.0552								3.51198
7.27	1.08753								2.06936
9.21	0.971098								2.73121
8.18	0.941371								2.28035
22.13	1.1437								25.2588
21.75	0.961877								16.148
18.38	0.894428								16.5779
15.34	1.35331								21.0983
11.34	0.798756								23.3736
10.35	0.847937								16.4202
21.94	0.97933								34.377
20.3	1.00927								19.6839
19.94	1.0114								24.9115
19.46	0.99308
19.42	0.820069
18.72	1.18685
17.95	1.14311
17.58	1.65083
16.98	1.49076
19.06	1.09
20.08	1.11
19.07	1.03
22.16	0.86
12.59	0.74
12.87	0.85
19.79	1.02
16.89	0.98
14.7	0.98
13.99	1.12
10.8	1.02
15.31	1.1
17.91	1.05
18.06	1
18.82	0.95
20.18	1
18.76	0.99
17.12	0.76
19.71	1.04
19.34	1.03
18.68	1.02
19.99	1.07
17.72	0.99
16.3	1.1
19.83	1.06
18.76	1
17.95	1.03
20.39	1.1
19.25	1
20.09	1.04
18.7	2.06
17.88	1.98
16.6	1.77
20.95	1.95
17.68	1.12
19.34	1.9
17.92	1.12
16.95	0.9
15.05	1.12
20.85	0.93
19.4	0.94
19.9	0.94
10.19	0.97
17.47	1.06
15.33	0.92
16.71	1.18
17.85	1.12
16.87	0.94
17.83	1.16
17.71	1.09
17.71	1.07
19.57	0.97
18.79	0.98
17.47	1
18.33	1
18.2	0.97
17.87	0.98
18.58	0.92
21.32	0.93
18.4	0.93
20.62	0.98
19.24	1.03
18.05	0.86
18.91	1.08
18.99	1.09
18.45	0.99
18.48	1
20.71	1.02
17.96	0.95
20.2	1.12
20.18	1.02
18.04	0.86
19.07	1.02
19.03	0.95
16.73	1.03
19.08	1.08
21.8	0.98
15.27	0.95
21.48	4.78
15.91	4.01
6.06	4.21
14.58	2.01
19.35	1.22
18.2	2.28
18.02	1.84
22.19	1.66
18.34	1.66
20.9	0.99
19.38	0.93
19.1	1.09
19.17	1.01
10.01	0.93
4.5	1.06
7.31	1.03
22.84	0.9
14.06	1.07
26.52	2.13
30.5712	1.92
36.5158	1.81
24.9458	1.03
26.05	1.04
14.67	0.93
14.15	6.04
25	5.83
14.71	5.86
14.93	3.6
17.65	3.58
17.68	2.94
17.92	2.87
19.92	2.63
19.46	1.8
20.91	1.06
22.61	0.99
21.2	0.95
23.12	1.02
17.69	0.98
14.76	1
14.34	1.07
19.13	1.01
15.26	0.92
17.93	1.02
21.2	0.98
19.19	0.98
20.47	0.98
17.58	0.93
18.42	1.1
17.48	1.03
20.13	0.96
19.95	1.14
20.17	1.03
22.44	0.97
21.21	1.15
21.4	0.878425
17.48	0.965753
17.4	0.824486
15.98	0.767979
18.06	0.803938
17.4	0.798801
17.2	0.950342
19.13	0.994007
19.16	0.952911
19.18	0.981164
16	0.986301
15.18	1.03253
16.4
17.15
16.86
18.4
17.8
17.57
18.77
14.83
15.81
15.89
17.66
16.95
18.38
16.12
16.15
16.95
16.42
17.2
16.98
19.55
18.52
19.89
18.91
18.26
19.11
15.31
15.56
14.66
18.2
13.85
17.47
17.1
20.88
15.95
26.71
26.15
27.55
25.89
25.05
27.45
25.71
28.16
25.99
27.15
26.49
25.92
26.55
25.07
24.72
28.03
26.85
24.22
27.12
26.71
25.1
26.22
26.71
24.68
26.89
26.89
25.27
26.4
28.13
25.11
26.59
27.33
25.43
26.98
26.45
24.42
27.11
28.14
25.07
27.65
27.01
25.77
27.87
29.56
27.42
28.32
28.92
25.92
28.19
27.81
26.43
26.44
27.24
24.89
28.81
27.64
26.16
28.32
27.64
26.49
27.62
27.97
25.95
21.6
19.18
18.24
21.66
19.59
19.84
20.2
15.52
12.01
8.21
8.51
7.3
9.51
10.14
9.37
12.9
14.97
13.53
15.1518
14.8568
17.8261
11.9218
17.0308
18.7569
14.8488
12.666
11.204
12.123
9.791
12.14
9.293
11.083
11.68
17.155
13.854
15.853
13.61
16.086
14.971
15.202
14.272
22.3547
20.7691
17.9926
26.5612
19.6277
19.8229
20.0284
19.4224
21.6207
15.6546
15.1115
15.5979
9.69086
9.19
9.00735
7.21212
4.24951
14.3676
6.08679
12.5509
2.60505
2.48885
12.039
2.26943
20.3987
21.2554
13.306
12.0481
11.3203
11.9692
11.1818
13.5103
16.1496
12.0107
11.9038
11.521
17.4464
19.09
18.1903
20.3761
16.3772
20.4731
13.1476
12.7259
13.5635
19.3372
19.5718
20.3812
12.0278
11.7883
12.0321
19.0138
18.7785
17.7128
16.3545
13.1088
7.25431
11.8517
10.4422
11.7266
19.9883
14.9267
16.2082
11.7242
11.6493
11.876
19.1211
18.8893
18.5398
17.3922
16.8815
6.55927
7.30167
4.37291
4.87163
19.4839
19.6188
20.3138
11.9359
11.196
10.6657
19.8581
18.6194
18.3322
16.5453
15.4332
9.77263
6.98203
7.90051
4.55584
19.5572
18.9648
20.2053
11.8161
11.7605
11.8076
19.564
19.6955
18.2837
17.292
16.07
17.4569
10.1033
4.74262
10.2612
19.3812
18.9648
19.9326
2.8546
1.69993
2.56593
12.1038
16.8235
7.55709
17.4698
15.9925
16.1153
13.8206
17.5739
12.6281
4.27856
4.09949
4.54044
1.9199
1.85797
1.89017
20.217
19.4692
20.1144
11.4811
11.4438
11.4488
11.7156
11.412
11.3564
10.1626
9.9654
9.47059
16.9284
22.7482
20.386
17.5044
24.3302
21.1828
17.6387
23.3492
20.2834
17.7574
24.1425
20.3388
16.719
23.2423
20.2177
26.33
20.48
21.96
24.85
20.05
22.18
41.24
30.34
32.55
34.29
30.67
31.78
31.64
31.12
31.88
32.5
30.53
30.55
32.38
28.44
30.18
35.09
31.32
33.49
32.78
30.31
32
23.66
21.31
20.59
26.98
21.75
26.37
27.24
24.24
26.16
27.64
25.38
26.56
26.15
23.86
24.23
22.58
19.59
20.06
10.91
9.78
10.26
12.13
9.08
12.69
11.79
13.27
11.8
10.25
11.97
12.53
11.94
11.94
13.13
12.32
13.25
12.46
11.33
12.44
12.66
11.82
11.83
13.14
12.21
13.15
12.82
11.55
12.54
12.86
11.06
11.14
12.46
11.57
13.04
12.5
10.59
11.89
12.68
7.12
6.99
9.4
8.95
4.82
4.74
6.41
8.56
4.32
3.4
3.37
7.62
6.77
2.69
2.7
3.14
6.59
2.48
17.47
15.33
16.71
17.85
16.87
17.83
17.71
17.71
19.57
18.79
17.47
18.33
18.2
17.87
18.58
21.32
18.4
20.62
19.24
18.05
18.91
18.99
18.45
18.48
20.71
17.96
20.2
20.18
18.04
19.07
19.03
16.73
19.08
21.8
15.27
21.48
15.91
6.06
14.58
19.35
18.2
18.02
22.19
18.34
20.9
19.38
19.1
19.17
10.01
4.5
7.31
5.49
5.57
5.62
6.26
5.56
6.27
7.22
6.22
6.96
6.23
5.57
6.15
5.56
5.59
5.57
6.43
6.52
6.63
7.41
7.23
7.29
6.71
5.66
6.29
6.34
6.29
6.59
6.7
7.04
7.26
4.71
1.98
4.64
5.73
5.83
6.11
6.9
6.41
6.82
4.98
4.78
5.29
7.94
7.18
7.71
7.04
6.77
6.85
3.6
4.01
5.4
8.12
7.41
8.11
7.04
6.56
7.12
5.77
4.75
5.83
8.41
7.78
8.36
7.81
7.63
7.95
6.29
5.93
6.32
9.16
8.48
8.91
7.19
6.88
6.92
9.59
8.22
8.21
6.23
5.81
6.34
6.22
4.15
6.32
3.24
3.61
5.16
7.08
4.67
6.67
5.63
4.62
6.16
16.7
15.46
15.86
16.59
15.7
16.12
16.88
15.93
17.06
15
16.9
17.86
3.65
8
6.5
17.47
15.99
16.68
17.5
16.53
17.72
18.89
17.3
17.83
19.64
17.6
18.36
18.43
14.58
16.36
20.12
18.29
19.83
19.9
18.13
19.24
20.08
18.32
19.63
21.21
20.12
20.54
22.13
19.5
22.37
6.97
5.06
5.95
17.39
16.69
17.25
36.65
31.53
34.06
28.23
25.04
25.96
22.24
20.84
21.32
38.08
34.22
34.93
29.39
26.38
26.6
23.23
21.48
22.29
37.6
34.66
34.54
28.83
25.98
27.04
24.11
22.48
22.21
33.51
32.99
32.24
36.22
34.94
34.09
37.67
35.86
35.63
28.73
27.41
22.52
29.71
29.45
29.5
31.04
29.98
29.23
39.36
35.05
34.75
31.45
30.58
30.34
31.98
30.7
28.81
37.49
34.5
33.37
31.5
30.48
30.18
32.13
30.77
29.66
34.68
31.47
31.04
31.15
30.18
30.72
30.47
29.67
29.43
30.27
27.91
26.44
25.82
24.83
22.21
30.18
29.53
29.22
7.04
6.55
4.8
28.63
27.58
27.57
10.83
10.03
7.93
6.01
6.19
5.41
32.8
32
32.41
33.46
31.03
31.69
42.74
37.4
37.8
34.29
30.67
31.78
31.64
31.12
31.88
35.09
31.32
33.49
32.78
30.31
32
23.66
21.31
20.59
40.67
36.73
37.35
28.97
26.04
27.21
24.12
22.49
22.6
40.66
36.59
37.48
29.56
26.64
27.04
23.36
21.49
22.39
15.5563
16.0252
15.5185
15.9402
16.4052
16.2283
32.38
28.44
30.18
28.01
26.88
27.71
26.42
25.76
26.02
33.58
31.32
27.06
17.7971
18.3673
16.9212
