# Supplementary material for: A SHERLOCK toolbox for eco-epidemiological surveillance of African trypanosomes in domestic pigs from Western Africa
Source: eLife. 2025 Sep 22;14:RP106823. doi: 10.7554/eLife.106823 (PMC12453586; doi:10.7554/eLife.106823)
Supplement: Figure 2—source data 1. [file elife-106823-fig2-data1.xlsx]

## Sheet: Sheet1
	pan-trypanosomatid																								pan-Trypanozoon												T. congolense			T. vivax			T. theileri
10ˆ7	20.3987	21.2554	13.306	12.0481	11.3203	11.9692	11.1818	13.5103	16.1496	12.0107	11.9038	11.521	17.4464	19.09	18.1903										19.8538	12.1637	18.5146	19.2118	18.2448	13.001							9.09312	8.96106	7.86738	15.6407	14.0212	13.3394	19.6016	17.9666	18.8251	21.9656	21.8324	14.394
10ˆ6	20.3761	16.3772	20.4731	13.1476	12.7259	13.5635	19.3372	19.5718	20.3812	12.0278	11.7883	12.0321	19.0138	18.7785	17.7128										18.8012	18.6842	19.5146	19.6302	18.22	21.3533							8.99492	9.12528	8.84086	15.8032	4.50934	3.09714	19.9141	23.6845	20.2477	16.3618	15.4495	7.61487
10ˆ5	16.3545	13.1088	7.25431	11.8517	10.4422	11.7266	19.9883	14.9267	16.2082	11.7242	11.6493	11.876	19.1211	18.8893	18.5398										18.9532	15.8392	20.2047	20.6684	19.376	21.4525							9.40632	9.70937	9.40463	9.16625	2.97758	2.72354	21.182	11.2356	16.1982	21.7192	18.596	12.1465
10ˆ4	17.3922	16.8815	6.55927	7.30167	4.37291	4.87163	19.4839	19.6188	20.3138	11.9359	11.196	10.6657	19.8581	18.6194	18.3322										19.0439	19.2836	19.3509	16.6767	17.2159	10.7262							9.80756	9.66196	8.99323	0.973225	0.915318	0.88543	20.3296	20.2295	19.8413	21.6459	21.7059	20.9134
10ˆ3	16.5453	15.4332	9.77263	6.98203	7.90051	4.55584	19.5572	18.9648	20.2053	11.8161	11.7605	11.8076	19.564	19.6955	18.2837										20.4532	18.5409	19.1462	16.5527	17.2872	10.9277							9.37923	9.40124	9.3386	1.00872	0.975093	0.892902	20.3418	16.908	17.4479	21.6559	20.9667	19.7947
102	17.292	16.07	17.4569	10.1033	4.74262	10.2612	19.3812	18.9648	19.9326	2.8546	1.69993	2.56593	12.1038	16.8235	7.55709										18.8596	19.6374	19.8713	14.3027	15.9421	15.6849							9.51975	9.32336	6.48758	1.10959	1.01806	0.917186	20.6148	21.816	20.912	21.1698	22.8812	21.3729
10	17.4698	15.9925	16.1153	13.8206	17.5739	12.6281	4.27856	4.09949	4.54044	1.9199	1.85797	1.89017	20.217	19.4692	20.1144	11.4811	11.4438	11.4488	11.7156	11.412	11.3564	10.1626	9.9654	9.47059	17.8246	16.3216	17.7719	17.9922	17.125	17.3594	13.751	13.7355	16.0754	19.5252	18.0132	17.9179	3.08973	2.9272	2.02991	1.00872	0.948941	0.909714	19.0222	20.0779	18.7401	19.7814	20.6903	19.2752	15.6643
1	2.65959	1.80307	2.52782	1.21387	1.06771	1.09001	0.956473	0.88355	0.968344	0.840342	0.774056	0.605132	5.59862	6.25606	4.90657										0.963542	0.927083	0.966146	1.01412	1.19153	1.10415							1.29345	1.2105	1.12415	0.933998	0.924658	0.919054	1.41622	1.20811	1.0027	0.951049	0.835664	1.02098
0.1	0.860908	0.885066	1.00366	2.39059	2.42279	2.13047	0.807236	0.551159	0.847937	0.523877	0.532431	0.508909	3.10727	3.16609	2.10381										1.11458	0.867188	0.992188	0.921447	1.06973	1.09356							1.43397	1.39503	1.21558	0.954545	0.990037	0.797634	1.29021	1.16783	1.22378	1.26486	1.01622	1.18378
Water	1.15733	0.827586	1.01509	0.933382	0.979502	1.08712	1.02439	0.920411	1.0552	1.08753	0.971098	0.941371	1.1437	0.961877	0.894428	1.35331	0.798756	0.847937	0.97933	1.00927	1.0114	0.99308	0.820069	1.18685	0.929825	1.09649	0.973684	1.03385	1.05208	0.914062	1.1343	0.864669	1.00103	0.982348	1.08561	0.932039	0.976862	1.06659	0.956546	0.907846	0.995641	1.02927	0.89181	1.07685	1.03134	1.03219	0.915649	1.05216	0.933566
[truncated: 5 more columns]
