# Supplementary material for: A SHERLOCK toolbox for eco-epidemiological surveillance of African trypanosomes in domestic pigs from Western Africa
Source: eLife. 2025 Sep 22;14:RP106823. doi: 10.7554/eLife.106823 (PMC12453586; doi:10.7554/eLife.106823)
Supplement: Figure 2—source data 2. [file elife-106823-fig2-data2.xlsx]

## Sheet: Sheet1
	T. simiae						T. suis
10ˆ10	25.8684	7.13816	13.5263	22.2435	23.7966	20.265	20.686	30.8346	35.6762
10ˆ9	37.75	21.8289	31.8618	23.9569	25.5532	21.8428	14.3752	12.5037	10.755
10ˆ8	38.6908	22.2105	31.5526	25.8428	25.1433	22.8752	11.4591	12.5563	12.4996
10ˆ7	37.9737	17.0724	27.5724	25.7319	25.2481	22.3205	12.9841	14.2388	11.8374
10ˆ6	36.0526	14.2434	26.6711	24.2989	24.6225	16.3544	10.3561	13.208	10.2402
10ˆ5	27.0263	3.375	8.23026	15.9445	16.379	4.68105	8.80246	16.8905	12.7023
10ˆ4	21.9605	2.46711	5.10526	18.5886	18.1541	5.54391	10.5477	12.9712	13.1094
10ˆ3	14.8224	1.64474	3.41447	14.9091	11.7874	4.48382	9.9368	11.8872	12.4974
10ˆ2	8.34868	1.44737	2.01316	5.09091	4.13251	1.65794	3.96701	5.52998	5.56975
10ˆ1	5.53289	0.973684	1.30921	0.992296	0.893683	1.05701	0.811683	0.995641	1.16173
Water	1.44737	0.888158	0.940789	1.0077	1.22034	0.828968	1.05922	1.10998	1.1456
