# Supplementary material for: A SHERLOCK toolbox for eco-epidemiological surveillance of African trypanosomes in domestic pigs from Western Africa
Source: eLife. 2025 Sep 22;14:RP106823. doi: 10.7554/eLife.106823 (PMC12453586; doi:10.7554/eLife.106823)
Supplement: Figure 3—figure supplement 1—source data 1. [file elife-106823-fig3-figsupp1-data1.xlsx]

## Sheet: Sheet1
Single pan-trypanosomatid SHERLOCK
Time (minutes)	5000 pg/μL = 10ˆ7 p/mL									500 pg/μL = 10ˆ6 p/mL									50 pg/μL = 10ˆ5 p/mL									5 pg/μL = 10ˆ4 p/mL									0.5 pg/μL = 10ˆ3 p/mL									0.25 pg/μL = 500 p/mL
0	0.96	0.87	0.91	0.96	0.96	0.93	1.01	0.95	0.97	0.96	0.91	0.89	0.94	0.91	0.88	0.91	0.88	0.9	0.92	0.89	0.92	0.93	0.9	0.94	0.92	0.91	0.91	0.93	0.94	0.96	0.98	0.95	0.96	0.96	0.95	0.98	0.97	0.8	0.77	0.99	1	0.86	0.98	0.98	0.94	0.94	0.94	0.89	0.96
10	1.56	1.38	1.45	1.37	1.29	1.26	1.35	1.27	1.19	1.41	1.2	1.42	1.22	1.11	1.21	1.15	1.14	1.16	1.45	1.3	1.47	1.28	1.17	1.23	1.14	1.11	1.18	1.17	1.14	1.17	1.12	1.14	1.1	1.04	1.05	1.05	0.96	0.8	0.74	0.98	0.98	0.82	0.98	1.01	0.93	0.9	0.9	0.89	0.92
20	4.98	4.41	4.59	4.47	4.19	4.04	4.06	3.75	3.63	4.21	3.6	4.08	3.51	3.23	3.37	3.24	3.09	3.24	4	3.59	3.8	3.44	3.24	3.31	2.67	2.51	2.6	2.7	2.38	2.6	2.32	2.21	2.32	1.5	1.48	1.55	1.03	0.86	0.85	1.17	1.14	0.99	1.04	1.05	1.02	1.06	1	1.02	1.03
30	8.74	7.99	8.13	8.45	8.01	7.77	7.93	7.64	7.47	7.55	6.84	6.93	6.86	6.29	6.36	6.56	6.29	6.44	7.01	6.55	6.45	6.49	6.16	6.33	5.33	5.21	5.16	4.78	4.45	4.68	4.4	4.26	4.52	2.6	2.49	2.69	1.2	0.96	0.95	1.57	1.46	1.32	1.13	1.08	1.13	1.2	1.14	1.18	1.19
40	11.35	10.26	10.53	11.05	10.47	10.46	10.62	10.38	10.35	9.88	9.16	9.13	9.38	8.84	9	9.4	8.97	8.91	9.29	8.84	8.55	9.14	8.71	8.71	7.94	7.68	7.58	6.6	6.34	6.53	6.45	6.29	6.67	3.8	3.78	4.01	1.38	1.07	1.11	2.07	2	1.66	1.26	1.21	1.26	1.35	1.31	1.4	1.44
60	13.75	12.95	12.88	14.3	13.53	13.6	13.72	13.25	13.44	12.54	11.84	11.63	12.74	11.98	11.97	12.85	12.28	12.13	11.98	11.72	10.81	12.08	11.71	11.67	10.94	10.7	10.75	9.24	9.02	8.88	9.48	9.27	9.51	6.26	6.04	6.18	1.83	1.36	1.37	3.14	3.04	2.48	1.58	1.56	1.58	1.8	1.75	1.75	1.97
90	14.15	13.18	13.33	14.67	14.01	14.52	14.48	13.94	14.33	13.47	12.66	12.56	13.94	13.13	13.69	13.85	13.35	13.55	13.27	12.98	12.23	13.9	13.39	13.62	13.13	12.9	13	11.21	11.21	10.29	11.91	11.71	11.3	8.37	8.24	8.25	2.31	1.78	1.63	4.37	4.1	3.38	2.07	2.01	2.04	2.25	2.2	2.19	2.53
120	13.64	12.82	13.13	14.56	13.84	14.4	14.08	13.77	14.35	13.36	12.87	12.71	14.08	13.41	13.83	14.19	13.48	13.85	13.17	13.05	12.58	14.14	13.63	13.82	13.82	13.31	13.63	11.75	11.61	11.03	12.7	12.59	12.45	9.42	9.25	9.42	2.8	2.06	1.87	5.16	5.06	3.87	2.44	2.44	2.32	2.61	2.58	2.47	3.01
150	14.06	13.54	13.48	15.28	14.25	15.18	14.66	14.26	14.93	13.94	13.41	12.93	14.97	14.14	14.61	15.03	14.47	14.58	13.83	13.89	12.84	15.11	14.52	14.72	14.76	14.46	14.51	12.45	12.4	11.48	13.63	13.48	13.22	10.66	10.41	10.4	3.13	2.34	2.14	6.06	5.68	4.59	2.81	2.81	2.74	2.95	2.95	2.86	3.48
180	14.51	13.81	13.94	15.89	15.04	15.91	15.43	14.9	15.73	14.56	14.03	13.03	15.82	15.03	15.07	16.07	15.39	15.1	13.72	14.03	12.57	15.18	14.87	14.71	14.94	14.54	14.58	12.18	12.55	11.82	13.95	13.78	14.06	11.23	11.02	11.48	3.53	2.57	2.39	6.99	6.74	5.39	3.3	3.24	3.35	3.48	3.51	3.38	4.25
Double pan-trypanosomatid SHERLOCK
Time (minutes)	5000 pg/μL = 10ˆ7 p/mL									500 pg/μL = 10ˆ6 p/mL									50 pg/μL = 10ˆ5 p/mL									5 pg/μL = 10ˆ4 p/mL									0.5 pg/μL = 10ˆ3 p/mL									0.25 pg/μL = 500 p/mL
0	0.99	0.97	0.92	0.94	0.94	0.92	0.97	0.95	0.95	0.96	0.9	0.94	0.94	0.9	0.89	0.93	0.91	0.94	0.97	0.95	0.92	0.93	0.91	0.89	0.92	0.87	0.92	0.97	0.92	0.97	0.98	0.96	0.99	0.96	0.95	0.95	1.05	0.98	0.96	1	0.97	0.98	0.99	0.95	1.04	0.95	0.94	0.92	0.94
10	1.28	1.27	1.18	1.28	1.25	1.17	1.27	1.25	1.2	1.14	1.1	1.12	1.13	1.13	1.1	1.11	1.15	1.16	1.24	1.27	1.21	1.24	1.2	1.15	1.08	1.1	1.14	1.16	1.15	1.05	1.1	1.08	1.09	1.04	0.99	1	1	1	0.92	0.98	0.95	1	0.97	0.95	0.97	0.96	0.96	0.93	0.94
20	4.17	4.03	3.65	3.93	3.86	3.39	3.9	4.11	3.71	3.22	3.18	3.07	3.14	3.09	2.92	3.18	3.27	3.23	3.24	3.23	3.03	3.1	3.04	2.89	2.49	2.54	2.52	2.23	2.22	2.16	2.18	2.22	2.13	1.39	1.45	1.44	1.08	1.06	1	1.13	1.09	1.14	1.02	0.94	1.02	1.05	1.02	1.04	1.03
30	8.76	8.58	7.84	8.27	7.99	7.47	8.27	8.16	8.05	7.02	6.87	6.78	6.9	6.64	6.53	6.9	7.04	6.9	6.9	6.76	6.38	6.34	6.23	6.1	5.49	5.48	5.55	4.67	4.69	4.59	4.65	4.65	4.81	2.58	2.63	2.69	1.23	1.21	1.19	1.62	1.56	1.55	1.18	1.09	1.17	1.22	1.25	1.26	1.22
40	11.63	11.39	10.91	11.14	10.83	10.4	11.11	10.85	11.23	10.01	9.78	9.65	9.93	9.41	9.15	9.6	9.71	9.85	9.99	9.69	9.17	9.25	9.01	8.83	8.2	8.24	8.25	7.24	7.06	7.07	7.36	7.12	7.13	4	3.91	4.12	1.47	1.45	1.35	2.22	2.09	2.16	1.3	1.22	1.34	1.4	1.44	1.46	1.42
60	15.28	14.74	14.74	14.86	14.19	14.16	14.55	14.11	15.07	13.98	13.6	13.56	13.84	13.2	13.09	13.3	13.26	13.62	13.96	13.67	12.99	13.25	12.57	12.56	12.03	11.98	11.98	11.24	10.93	10.96	11.22	10.85	11.1	7.08	6.95	7.29	2.13	2.05	1.94	3.68	3.42	3.63	1.68	1.63	1.8	1.92	2.04	2.03	2.12
90	15.92	15.32	15.54	15.67	14.72	15.02	15.17	14.76	16.12	15.56	14.86	15.19	15.41	14.63	14.71	14.8	14.74	15.38	16.45	16	15.28	15.44	15.06	14.66	14.5	14.46	14.69	14.32	13.93	13.57	14.23	13.85	13.71	10.1	9.89	10.22	3.05	3	2.69	5.85	5.14	5.36	2.26	2.2	2.4	2.81	2.87	2.8	2.92
120	15.94	15.26	15.65	15.43	14.82	15.09	15.15	14.69	16.2	15.87	15.34	15.54	15.79	15.09	15.27	14.96	15.02	15.77	16.97	16.67	15.92	16.15	15.59	15.31	15.4	14.98	15.45	15.62	15.16	14.91	15.57	15.03	14.97	11.81	11.68	12.04	4.16	4.01	3.54	7.88	6.94	7.08	2.95	2.75	3.04	3.64	3.61	3.56	3.77
150	16.93	16.05	16.89	16.5	15.71	16.1	16.1	15.46	17.44	17.58	16.79	17.14	17.41	16.4	16.67	16.54	16.48	17.28	18.7	18.29	17.4	17.66	16.72	16.89	16.81	16.43	16.81	17.38	16.58	16.25	17.1	16.47	16.43	13.64	13.28	13.82	5.22	5.16	4.66	9.81	8.7	9.06	3.65	3.49	3.98	4.75	4.82	4.68	4.89
180	17.6	16.62	17.62	16.94	16.17	16.83	16.27	15.57	18.12	18.08	17.42	17.64	18.14	16.92	17.15	17.18	16.86	17.76	18.54	18.05	17.21	17.33	16.61	16.18	16.64	16.02	16.7	17.47	16.94	16.89	17.19	16.58	16.9	14.05	13.8	14.61	6.53	6.18	5.67	11.44	10.1	10.74	4.46	4.25	4.84	5.95	5.96	5.82	6.1
[truncated: 32 more columns]
