# Supplementary material for: A SHERLOCK toolbox for eco-epidemiological surveillance of African trypanosomes in domestic pigs from Western Africa
Source: eLife. 2025 Sep 22;14:RP106823. doi: 10.7554/eLife.106823 (PMC12453586; doi:10.7554/eLife.106823)
Supplement: Figure 3—source data 1. [file elife-106823-fig3-data1.xlsx]

## Sheet: Sheet1
pan-Trypanozoon	Single pan-trypanosomatid	Multiplex pan-trypanosomatid
0.915663	1.8569	3.51938
1	1.6024	4.15338
9.53253	1.98201	13.4912
1.07711	1.89289	10.0037
11.5462	1.85433	4.33931
0.855422	1.8072	3.76234
2.09157	4.08141	6.29835
0.978698	1.32562	5.30457
26.1151	1.48158	6.6181
26.1151	1.24165	4.62285
1.14408	0.818338	5.91115
0.993491	1.12082	5.46143
3.42731	2.0377	12.158
0.966265	12.9666	16.8263
8.64337	2.09854	5.49159
0.990828	0.767781	3.67514
1.02456	1.00943	5.79653
1.09408	1.23393	14.7356
28.5601	1.14739	15.1607
1.02426	1.05141	1.75448
1.04408	1.20137	14.2464
0.950201	2.46615	17.7088
1.0568	0.898029	4.6766
1.07012	1.01114	5.43346
1.04349	0.903171	6.27203
1.04941	1.05998	6.53309
1.04586	0.983719	6.37623
20.3614	1.77978	22.8016
21.2635	1.78235	21.4623
1.05296	1.06512	6.5117
23.5598	2.42245	21.5495
1.00651	1.00257	3.93949
18.8434	2.24593	14.2371
5.07711	3.86118	15.481
15.3205	2.32048	15.2912
9.37189	10.5184	17.9287
22.7847	2.00343	17.2459
20.3735	3.93488	18.9395
1.07485	0.938303	5.04077
33.6488	1.01628	10.6673
29.8003	1.02999	4.35686
1.07751	0.816624	1.2011
0.990237	0.865467	2.2936
1.05414	0.963153	1.08263
1.03935	0.866324	0.85064
17.0948	5.72751	18.4037
1.07544	0.874036	1.07441
19.6207	0.887746	4.02559
0.82008	1.35218	2.94186
1.07149	1.42845	2.01664
0.747791	1.74293	6.9011
0.938153	5.10283	16.8005
1.08343	1.12339	1.05356
1.07249	1.25878	4.4649
18.0129	3.06684	16.7731
1.03994	1.1868	1.37057
20.7165	9.11054	14.0676
1.11807	1.79434	1.07166
24.4048	3.82862	9.2128
13.3767	2.4473	2.3468
0.853012	1.58183	1.26197
1.48675	1.41731	1.12431
0.987149	1.69409	0.728885
1.06568	1.21765	1.0958
1.12456	1.11397	1.10293
1.0739	2.04713	1.72706
1.06213	1.22451	1.29762
14.8265	1.96144	1.15777
16.2771	3.012	3.25832
1.13728	1.28278	0.966362
1.13669	1.27764	0.883547
15.2859	1.53985	1.03327
1.13669	1.28278	0.711883
1.11479	1.22793	0.73766
1.08755	1.33419	0.909872
1.10562	1.21594	0.963071
1.16707	1.46958	0.869287
7.46506	2.34362	1.9596
14.2583	1.17909	0.790859
12.2378	2.17395	1.83455
15.494	4.72579	1.90585
19.1671	2.52271	2.06325
23.3639	2.41045	0.821024
17.8498	2.00171	0.739854
0.993491	1.25364	0.729433
1.1253	1.32391	0.675686
17.4056	2.86033	1.30475
14.4996	1.6898	0.944973
1.11004	12.916	20.4504
0.990361	1.485	5.89398
7.61044	2.76092	17.3771
1.02604	1.29134	5.06705
1.20803	1.33848	15.3777
1.02651	1.40446	4.42808
0.991968	1.30848	1.98223
0.975904	3.79434	15.639
49.143	19.2795	21.204
45.4	21.9792	17.4143
49.0699	14.3611	18.9358
1.2755	1.02951	6.15244
1.01928	1.01562	4.06246
32.657	18.3611	16.263
0.972691	0.987847	2.91404
1.19116	1.02083	3.25731
1.28032	1.04688	2.74728
1.249	1.32812	4.41146
1.29398	1.07465	6.01891
1.21285	1.29688	2.92779
1.22169	0.942708	5.37135
1.20161	1.06424	1.63152
1.22892	1.05035	2.81547
1.31084	0.967014	6.4
1.18313	1.07465	4.68481
1.22329	4.86806	12.3123
1.31807	1	5.93066
35.1333	10.7344	17.5072
1.19518	0.954861	4.78797
1.16305	0.951389	1.46074
1.2988	1.15278	2.96447
1.19759	1.01389	6.44756
1.58635	1.01736	3.81891
24.049	15.4323	14.4395
1.38153	4.51389	12.2516
1.29478	5.9375	18.9433
2.10763	1	4.12149
2.53333	0.989583	2.24814
26.861	1.12847	7.50602
26.6353	1.15625	16.8086
33.4506	1.05556	7.56504
1.07952	1.03646	4.55358
34.4586	1.05035	4.4533
1.5494	1.05729	5.69914
27.257	1.06944	4.28653
37.9438	12.783	15.5593
33.6827	15.816	16.6355
1.12289	0.972222	4.15587
1.65301	1.08681	3.88619
34.0827	6.55729	19.6193
35.0281	2.7691	13.8094
1.98072	7.12674	18.7713
23.0956	9.15799	15.2873
38.6474	1.65799	11.4066
30.0209	13.8559	16.4895
35.1044	4.24653	13.3331
1.27309	1.12847	6.05746
39.0177	8.07812	18.0646
39.6088	1.64236	11.4171
38.2956	1.61111	18.437
20.6185	1.15278	3.99779
36.1896	1.03646	4.66685
36.0281	1.03299	6.52431
34.5454	2.9566	16.6691
1.14618	0.864583	5.47182
33.7237	1.18056	12.8718
41.8731	6.52951	19.253
30.3711	1.30208	6.84751
38.8482	4.36806	19.6851
1.15422	1.14757	1.09613
39.804	4.17535	15.8762
1.27871	1.09375	20.216
42.9365	11.349	14.5365
34.9133	1.07812	7.07569
42.3944	0.994792	5.58232
31.3598	1.74306	12.2757
1.22249	1.00521	5.70552
35.51	0.958333	13.0785
34.3084	1.83507	17.5403
1.1751	0.956597	5.04862
33.9743	0.944444
1.21928	1.09201	4.16796
1.23695	1.10417	2.31989
1.26426	1.11111	5.71547
1.21928	1.0816	1.54254
1.30201	0.940972	4.16133
1.151	1.06944	4.12707
1.04016	1.69792	3.80221
1.11888	1.11632	2.77611
1.4249	1.10764	1.2702
1.12129	1.18576	3.53941
1.34217	1.09201	2.15394
35.5679	9.67014	27.3177
39.4643	1.22049	4.71576
12.204	1.94271	1.20887
1.07068	1.02778	13.0433
1.22088	2.31944	8.56108
1.70522	2.08507	1.67882
6.13092	1.67882	1.54803
1.62811	1.13889	5.66379
1.30442	0.972222	2.97931
1.29398	1.01042	3.04803
1.37671	1.13368	1.86133
0.971084	1.06597	1.00271
0.993574	1.92535	13.248
34.261	1.51389	11.5108
42.8257	11.8698	27.9916
31.1133	1.41319	12.1389
39.2016	2.24653	18.1315
36.094	1.11285	7.83695
1.32129	0.963542	3.38719
31.0337	4.49653	5.26995
49.5904	1.29861	5.91355
1.28594	2.11632	16.5392
1.23695	2.02778	3.24089
34.3839	1.32118	18.2956
35.4482	2.00174	8.30616
34.6233	2.53299	11.9135
34.9719	1.17361	1.58276
33.1454	0.96875	1.62562
29.6739	1.15278	2.44655
32.604	1.63194	7.89458
1.09317	1.27083	1.2
1.15743	1.09375	1.72833
1.08755	1.10938	4.49631
1.20723	0.946181	1.15123
1.1245	1.01042	1.07217
1.16225	1.01389	1.07438
1.1743	1.06771	6.3303
1.16546	1.05382	1.06478
1.36064	1.25	2.10665
1.31486	1.05729	1.13202
1.22651	1.03819	1.23251
1.62088	1.04688	1.05665
34.1743	4.96701	5.06084
1.10924	0.972222	13.353
