# Supplementary material for: A SHERLOCK toolbox for eco-epidemiological surveillance of African trypanosomes in domestic pigs from Western Africa
Source: eLife. 2025 Sep 22;14:RP106823. doi: 10.7554/eLife.106823 (PMC12453586; doi:10.7554/eLife.106823)
Supplement: Figure 4—source data 1. [file elife-106823-fig4-data1.xlsx]

## Sheet: Sheet1
Trypanosomatid	Trypanozoon	T. vivax	T. congolense	T. b. gambiense	T. theileri	T. simiae	T. suis
3.51938	0.915663	1.30879	1.61975	1.30871	0.681188	0.923077	1.04264
4.15338	1	0.801636	1.04881	2.16987	0.714698	0.846154	1.01594
13.4912	9.53253	0.707566	4.02384	0.903988	0.753987	0.877585	0.682468
10.0037	1.07711	0.850716	1.52894	1.09453	0.858563	0.908189	0.991691
4.33931	11.5462	1.25562	2.19977	1.7223	0.705454	0.795699	0.835853
3.76234	0.855422	0.737219	0.955732	0.915805	0.665588	0.969396	0.572946
6.29835	2.09157	0.768916	1.19977	0.912851	0.676566	0.839537	0.995505
5.30457	0.978698	0.870647	1.55287	1.80784	0.699099	0.863524	0.844027
6.6181	26.1151	0.843905	1.62543	0.830076	0.6315	0.752688	0.843754
4.62285	26.1151	0.873134	0.947477	0.68495	0.666744	0.819686	0.784634
5.91115	1.14408	0.986318	1.88321	1.13535	0.699677	0.758478	0.937747
5.46143	0.993491	0.824627	1.48929	0.927926	0.722787	0.760132	1.11674
12.158	3.42731	0.533742	1.41771	0.920236	0.695632	0.76096	0.76856
16.8263	0.966265	0.866053	8.62089	1.14771	0.713543	0.834574	1.04645
5.49159	8.64337	0.758691	1.24404	1.01329	0.710654	0.750207	0.954911
3.67514	0.990828	0.925373	1.80166	0.783899	0.70141	0.784119	0.941016
5.79653	1.02456	0.958955	1.88597	0.983264	0.725676	0.91067	0.953276
14.7356	1.09408	1.16604	1.59364	0.781701	0.763809	0.924731	0.744313
15.1607	28.5601	0.937189	10.669	0.813218	0.749364	0.836228	1.24642
1.75448	1.02426	0.772388	1.28611	1.00562	0.764964	0.826303	0.947827
14.2464	1.04408	0.763682	1.30753	1.15038	0.759764	0.869313	0.909413
17.7088	0.950201	0.819018	8.61521	0.955687	0.751676	0.770885	1.09304
4.6766	1.0568	0.68408	1.5425	0.921696	0.734343	0.930521	0.842664
5.43346	1.07012	0.873134	1.67588	0.944051	0.775942	0.863524	1.06934
6.27203	1.04349	0.853234	1.75743	1.1797	0.88514	1.18031	0.822776
6.53309	1.04941	0.992537	1.80719	1.07415	0.790964	1.02399	0.966626
6.37623	1.04586	1.05286	1.76088	0.889812	0.837763	0.918114	1.11102
22.8016	20.3614	0.780164	9.03632	0.915805	0.786919	0.941274	0.822231
21.4623	21.2635	0.915133	4.20885	1.18612	0.818119	0.801489	0.981065
6.5117	1.05296	0.922886	3.53421	0.883582	0.775364	0.940447	0.939382
21.5495	23.5598	0.803681	7.68331	0.994092	0.83083	0.973532	0.776461
3.93949	1.00651	0.549129	1.2018	0.749817	0.823319	0.843673	1.0865
14.2371	18.8434	0.895706	8.08513	1.01034	0.659233	0.776675	0.619807
15.481	5.07711	0.800613	1.98411	0.994092	0.751098	0.853598	0.949734
15.2912	15.3205	0.783231	1.54938	1.02954	0.765542	0.80397	0.745947
17.9287	9.37189	0.853783	8.7412	1.02807	0.757453	0.913151	0.636153
17.2459	22.7847	0.854806	9.24291	1.01773	0.70661	0.860215	1.07642
18.9395	20.3735	0.842536	10.0726	1.02511	0.70141	0.894127	1.04836
5.04077	1.07485	0.653607	1.47547	1.05913	0.721632	0.781638	0.973709
10.6673	33.6488	0.657338	3.35867	0.928292	0.75052	0.88172	0.944558
4.35686	29.8003	0.889925	1.85556	1.15184	0.614745	0.980149	0.887617
1.2011	1.07751	0.715174	1.71389	0.919863	0.710076	0.91646	1.01049
2.2936	0.990237	0.808458	1.65515	0.863792	0.676566	0.83292	0.757662
1.08263	1.05414	0.807836	1.75812	1.04227	0.848163	0.851944	0.942651
0.85064	1.03935	0.922886	1.45612	0.848766	0.718743	0.826303	1.00994
18.4037	17.0948	0.837423	5.86152	1.0517	0.70661	0.906534	0.873723
1.07441	1.07544	0.777985	1.49689	1.05216	0.70141	0.908189	1.02438
4.02559	19.6207	0.846393	0.984105	0.975202	0.75572	0.904053	0.911048
2.94186	0.82008	0.997955	1.17594	1.11965	0.6419	0.770058	1.17613
2.01664	1.07149	0.92229	1.09989	1.15953	0.730876	0.854425	0.97153
6.9011	0.747791	0.822086	1.084	1.00591	0.790964	0.842845	0.868002
16.8005	0.938153	0.811861	8.90125	0.935007	0.691588	0.914806	0.873995
1.05356	1.08343	0.920398	1.12301	0.890178	0.740698	0.804797	0.83885
4.4649	1.07249	0.925995	2.17277	0.867823	0.69101	0.739454	0.97262
16.7731	18.0129	0.94274	1.26788	1.00591	0.833141	0.902399	0.82659
1.37057	1.03994	0.930348	1.36351	0.966773	0.759186	0.807279	0.903692
14.0676	20.7165	0.90593	0.911464	1.03397	0.786919	0.931348	1.07778
1.07166	1.11807	0.809816	1.38706	0.90842	0.693321	0.861042	0.810516
9.2128	24.4048	0.810838	1.24291	1.01625	0.714698	0.760132	0.925487
2.3468	13.3767	0.807771	2.13053	0.958641	0.742431	0.836228	0.790628
1.26197	0.853012	0.91411	1.39274	1.03397	0.733765	0.894127	0.869636
1.12431	1.48675	0.801636	0.987514	0.935007	0.670788	0.837882	1.08023
0.728885	0.987149	0.745399	0.824064	0.945347	0.69621	0.786601	0.791173
1.0958	1.06568	0.982587	1.44091	0.767408	0.698521	0.803143	0.975344
1.10292	1.12456	0.824627	1.42156	1.00012	0.764964	0.934657	0.832862
1.72706	1.0739	0.745399	1.20999	1.02068	0.700254	0.954508	0.867647
1.29762	1.06213	0.85199	1.27989	1.09651	0.812341	0.943755	0.854355
1.15777	14.8265	0.828221	1.13848	1.03397	0.838341	0.897436	0.819005
3.25832	16.2771	0.770961	10.3496	0.93353	0.814652	0.930521	3.84361
0.966362	1.13728	0.962687	1.55425	1.10384	0.829674	0.848635	0.771493
0.883547	1.13669	1.03296	1.72771	1.01661	0.842385	0.946237	0.918835
1.03327	15.2859	0.849693	2.0454	0.952733	0.788653	0.90488	0.951923
0.711883	1.13669	0.864428	1.40636	1.02358	0.602611	0.832093	0.940611
0.73766	1.11479	0.84204	1.17554	0.813951	0.743009	0.886683	0.895645
0.909872	1.08755	0.850716	0.83882	0.94387	0.754564	0.869313	0.860011
0.963071	1.10562	0.938433	1.17484	0.791962	0.831407	0.918941	0.944853
0.869287	1.16707	0.829243	0.867196	1.03102	0.774208	0.930521	1.02149
1.9596	7.46506	0.769939	4.97162	0.875923	0.814074	0.937138	0.832862
0.790859	14.2583	0.702736	1.37664	0.907036	0.728565	0.862696	0.959276
1.83455	12.2378	0.808794	6.79115	1.03102	0.824474	0.933002	0.852658
1.90585	15.494	0.761759	7.51873	0.936485	0.604923	0.851117	0.908088
2.06325	19.1671	0.801636	1.19523	0.968981	0.660966	0.915633	0.654129
0.821024	23.3639	0.820041	1.98865	1.11078	0.694477	0.851117	0.875566
0.739854	17.8498	0.873211	0.76958	0.920236	0.6523	0.882548	1.0427
0.729433	0.993491	0.878109	1.27643	0.849499	0.679455	0.745244	0.830882
0.675686	1.1253	0.799591	0.955732	0.960118	0.662122	0.806452	0.98586
1.30475	17.4056	0.807771	1.8479	1.01625	0.647677	0.83292	1.03563
0.944973	14.4996	0.783231	2.1294	0.949778	0.662122	0.81555	0.826357
20.4504	1.11004	0.831288	10.5619	0.985229	0.736076	0.908189	0.933541
5.89398	0.990361	0.821063	1.11918	1.14033	0.697365	0.780811	0.838235
17.3771	7.61044	0.805726	7.57435	1	0.77652	0.779984	0.980769
5.06705	1.02604	0.743781	1.35936	0.919863	0.677144	0.751861	0.845023
15.3776	1.20803	0.913088	1.11805	1.05022	0.828519	0.937138	0.695136
4.42808	1.02651	0.969325	1.10556	1.07386	0.762075	0.820513	1.12132
1.98223	0.991968	0.792434	1.0193	1.11374	0.766698	0.872622	0.849265
15.639	0.975904	0.839468	7.09194	0.932053	0.702565	0.824649	1.1332
21.204	49.143	0.831288	1.10102	1	0.655188	0.816377	0.987557
17.4143	45.4	0.812883	0.970488	1.02954	0.557546	0.987593	0.761595
18.9358	49.0699	0.875256	1.084	1.11374	0.689854	0.772539	1.06024
6.15244	1.2755	0.731126	0.967872	0.732592	0.644211	0.735318	0.813914
4.06246	1.01928	0.552651	0.756047	0.819081	0.786342	0.741935	0.901301
16.263	32.657	0.921268	1.04313	1.15805	0.656922	0.813069	0.835973
2.91404	0.972691	0.585268	0.841803	0.970437	0.682343	0.752688	0.92336
3.25731	1.19116	0.620816	0.766308	0.945883	0.658077	0.736973	1.23105
2.74728	1.28032	0.815417	1.05803	0.756413	0.770742	0.862696	0.753111
4.41146	1.249	0.680186	0.874786	0.992793	0.838918	0.987593	1.0116
6.01891	1.29398	0.72453	0.942951	0.676521	0.790386	0.808106	0.977941
2.92779	1.21285	0.640606	0.812118	0.897142	0.858563	0.883375	0.975396
5.37135	1.22169	0.638041	0.856829	0.956145	0.704299	0.866832	0.85888
1.63152	1.20161		0.842608	0.8897	0.892073	0.943755	0.733314
2.81547	1.22892		0.609715	0.729282	0.805408	0.885029	1.05571
6.4	1.31084		0.922369	1.00335	0.908828	1.00248	1.03139
4.68481	1.18313		0.796591	0.890292	0.788653	1.03888	1.06505
12.3123	1.22329	0.929448	1.26334	1.01625	0.788075	0.898263	1.08795
5.93066	1.31807		0.807584	0.857735	0.821008	0.911497	0.699661
17.5072	35.1333	0.899795	1.02043	1.10783	0.833141	0.923077	1.07636
4.78797	1.19518		0.924925	0.918114	0.848741	0.953681	0.812783
1.46074	1.16305		0.780997	0.79854	0.80483	0.8933	0.867081
2.96447	1.2988		0.945888	0.947711	0.838341	0.905707	1.09757
6.44756	1.19759		1.0236	1.08919	0.808875	0.771712	0.831165
3.81891	1.58635		0.813208	0.870758	0.864918	0.913151	0.937217
14.4395	24.049	0.988753	1.03973	1.18464	0.752253	0.913151	0.817025
12.2516	1.38153	0.976483	1.84109	1.14771	0.819852	0.853598	1.74576
18.9433	1.29478	0.809816	9.02043	1.1551	0.796741	0.829611	0.888292
4.12149	2.10763		0.798381	0.946527	0.803097	0.804797	0.866799
2.24814	2.53333	0.813	1.024	0.93734	0.75052	0.856079	0.877545
7.50602	26.861	0.787	0.739	1.01854	0.862029	0.854425	0.927602
16.8086	26.6353	0.708	0.819	0.811381	0.719321	0.794045	0.954186
7.56504	33.4506	0.814	1.059	1	0.708921	0.899917	0.71069
4.55358	1.07952		0.730379	0.828729	0.769586	0.813069	0.834559
4.4533	34.4586	0.902	0.963	0.953325	0.832563	0.853598	1.7319
5.69914	1.5494		0.740094	0.77131	0.628611	0.845327	1.12981
4.28653	27.257	0.994	1.093	0.915601	0.772475	0.824649	1.03054
15.5593	37.9438	0.764826	8.99886	0.937962	0.720476	0.764268	0.779412
16.6355	33.6827	0.851738	0.958002	0.935007	0.81523	0.889992	1.13235
4.15587	1.12289		0.650618	0.743489	0.721632	0.82134	1.04072
3.88619	1.65301		0.799915	0.824586	0.703721	0.868486	0.869627
19.6193	34.0827	0.867076	1.16232	1.01773	0.624567	0.839537	0.923077
13.8094	35.0281	0.924335	1.19296	0.968981	0.675988	0.770058	0.714367
18.7713	1.98072	0.820041	2.29966	0.998523	0.716432	0.82713	1.14282
15.2873	23.0956	0.823108	1.01816	1.11374	0.747053	0.797353	0.91629
11.4066	38.6474	0.797546	1.03178	1.05318	0.687543	0.869313	0.880373
16.4895	30.0209	0.759714	2.9807	0.720827	0.70661	0.856907	1.0905
13.3331	35.1044	0.711656	9.76504	0.930576	0.67021	0.842845	0.914593
6.05746	1.27309		0.763358	0.836425	0.803675	0.888338	0.972568
18.0646	39.0177	0.891616	9.02157	0.818316	0.867229	1.04632	0.718326
11.4171	39.6088	0.700409	0.881952	0.932053	0.764964	0.920596	0.859446
18.437	38.2956	0.651329	3.30761	0.872969	0.823897	0.961952	1.11058
3.99779	20.6185	0.958333	1.33172	0.946931	0.744165	0.801489	0.75707
4.66685	36.1896	0.738806	2.05114	0.960358	0.809452	0.909016	0.922511
6.52431	36.0281	0.767413	1.16379	0.845268	0.748209	0.842845	0.833428
16.6691	34.5454	0.726994	4.59818	0.929099	0.889762	0.919768	0.778281
5.47182	1.14618		0.917512	0.715075	0.838341	1.06865	0.789942
12.8718	33.7237	0.948383	1.04354	1.1087	0.764386	0.933002	0.663106
19.253	41.8731	0.770961	3.89784	0.862629	0.914028	0.954508	0.847797
6.84751	30.3711	0.909826	2.12992	0.955243	0.937139	0.961952	0.868269
19.6851	38.8482	0.794478	2.97276	0.896603	0.879362	1.08519	1.10547
1.09613	1.15422		0.940264	0.947711	0.870118	0.945409	0.925234
15.8762	39.804	0.758691	8.07037	0.914328	0.947539	0.944582	0.866489
20.216	1.27871		2.77989	0.845896	0.85394	0.915633	0.991544
14.5365	42.9365	0.788344	8.46538	0.983752	0.682921	0.880893	0.778816
7.07569	34.9133	0.863806	1.98618	1.21164	0.757453	0.882548	1.1077
5.58232	42.3944	0.906095	1.16102	1.02302	0.718743	0.826303	0.945705
12.2757	31.3598	0.597137	1.53802	0.980798	0.773053	0.948718	0.825545
5.70552	1.22249		0.777674	0.949487	0.718743	0.884202	0.963507
13.0785	35.51	0.91107	1.09744	0.907928	0.758031	0.872622	0.854473
17.5403	34.3084	0.799591	0.92622	0.936485	0.730298	0.856907	1.1798
5.04862	1.1751		1.25215	1.15726	0.767853	0.818031	0.919893
	33.9743	0.860075	1.06773	0.812021	0.748209	0.954508	0.720961
4.16796	1.21928		0.870729	0.903315	0.725676	0.88172	0.856698
2.31989	1.23695		0.862037	0.89562	0.800786	0.869313	1.07877
5.71547	1.26426		0.846442	0.891476	0.80483	0.879239	1.09746
1.54254	1.21928		0.642693	0.773678	0.792119	0.907362	1.01291
4.16133	1.30201		1.00827	1.00868	0.747053	0.851117	0.805964
4.12707	1.151		0.819855	0.828137	0.818697	0.894127	1.01335
3.80221	1.04016	0.853783	1.02611	1.22304	0.719898	0.890819	1.09969
2.77611	1.11888		1.13737	1.04538	0.831787	0.878881	0.908767
1.2702	1.4249		1.13916	1.27979	0.934821	0.946203	0.994215
3.53941	1.12129		0.935151	0.922849	0.943846	0.958192	0.88251
2.15394	1.34217		1.04917	0.996251	0.954375	0.913926	0.991989
27.3177	35.5679	0.870143	1.80136	1.06056	1.03334	1.03289	1.05073
1.20887	12.204	0.777096	1.59705	0.867061	1.03485	1.06794	1.00623
12.1389	31.1133	0.909826	1.03179	1.04668	1.0198	1.0541	0.983979
18.1315	39.2016	0.941718	2.32123	0.951256	0.922036	0.891792	0.931019
5.91355	49.5904	0.960821	1.7132	1.24616	0.98897	1.04211	0.913218
16.5392	1.28594	0.89366	3.41998	1.06056	1.06342	1.0541	1.0939
3.24089	1.23695		1.05403	1.16555	0.985209	0.897325	1.14241
5.66379	1.62811	0.799751	0.771942	1.0665	0.986714	0.984015	0.914108
2.97931	1.30442		0.717341	0.91101	0.910755	0.984937	0.934134
3.04803	1.29398		0.900639	0.93824	1.07395	1.03289	1.0494
1.86133	1.37671		1.00264	1.10162	1.10103	1.10759	1.14553
1.00271	0.971084		1.03127	1.01638	0.728754	0.853059	1.17713
8.30616	35.4482	1.04229	4.30615	1.13811	0.935573	0.993237	0.851357
4.71576	39.4643	0.975746	1.05183	0.96867	0.888193	0.90747	0.88251
13.0434	1.07068		0.845164	0.805051	0.857358	0.94897	1.01647
8.56108	1.22088	0.778119	0.93076	1.01477	0.920531	0.811559	1.04895
1.67882	1.70522	0.842536	1.042	1.02363	0.950614	0.901014	1.2283
7.83695	36.094	0.776119	0.939184	1.09527	1.08599	1.07808	0.866934
3.38719	1.32129		0.898594	1.17976	0.917523	0.891792	0.886515
	31.0337	0.915133	2.7151	1.19202	0.852093	0.821703	0.983979
1.54803	6.13092	0.874233	1.69694	1.09306	0.866383	0.901937	0.955496
13.248	0.993574	0.906953	2.14869	1.07386	0.979945	0.968337	1.27414
11.5108	34.261	0.863184	0.907395	1.03325	1.00401	0.94897	0.906542
27.9916	42.8257	0.848671	6.20885	1.08567	0.987465	0.989548	0.791277
18.2956	34.3839	1.06281	1.29026	0.964194	1.05214	1.01814	0.974633
11.9135	34.6233	0.966418	1.29164	0.863171	0.946854	0.962804	1.05874
1.58276	34.9719	0.824005	0.99378	0.869565	0.806969	0.850292	1.11883
	33.1454	0.74005	0.733241	0.881074	0.740035	0.92407	1.00979
2.44655	29.6739	0.826492	0.827229	0.982737	0.834044	0.854903	0.666667
7.89458	32.604	0.855721	1.26952	0.811381	0.867887	0.970181	1.33556
1.2	1.09317		0.996251	1.10517	0.970168	1.06702	0.976413
1.72833	1.15743		1.13046	1.19515	1.58085	1.05042	0.782377
4.49631	1.08755		1.29945	0.963102	1.00175	1.07624	1.20205
1.15123	1.20723		0.617128	0.733425	0.888945	0.994159	1.18647
1.07217	1.1245		1.03792	1.1247	1.30935	1.31878	1.11704
	1.16225		0.73089	0.877861	0.763349	0.773747	1.0445
6.3303	1.1743		1.01772	1.0886	0.806217	0.85767	0.802848
1.06478	1.16546		0.809118	0.995659	0.97092	0.898248	0.961282
2.10665	1.36064		0.873541	0.893252	0.910003	1.03474	1.26435
1.13202	1.31486		1.08445	1.07735	0.849837	0.776514	1.06275
1.23251	1.22651		0.815253	0.992107	1.02056	1.04673	0.983534
1.05665	1.62088	0.919776	0.969592	0.953964	0.817498	0.926837	1.04317
5.06084	34.1743	0.897388	11.5936	0.810742	0.837052	0.956348	0.965732
	1.10924		0.847465	1.00099	0.809977	0.894559	1.24477
