# Supplementary material for: A SHERLOCK toolbox for eco-epidemiological surveillance of African trypanosomes in domestic pigs from Western Africa
Source: eLife. 2025 Sep 22;14:RP106823. doi: 10.7554/eLife.106823 (PMC12453586; doi:10.7554/eLife.106823)
Supplement: Supplementary file 4. — The percentage identity of the target amplicon of pan-trypanosomatid RPA was evaluated using different degrees of exclusion, to assess its percentage of identity within the different groups and especially in the Phylum Euglenozoa, excluding the target group Kinetoplastea. The number of sequences evaluated is shown, as well as the percentage of sequences where the target regions of the pan-trypanosomatid guides (crRNAs) are conserved. [file elife-106823-supp4.xlsx]

## Sheet: Sheet1
	BLAST exclusion	Range of amplicon percentage identity (arithmetic mean)	Number of sequences included	Percentage of sequences with conserved crRNA		Sequences with partially conserved crRNA
				crRNA 1	crRNA 3	crRNA 1	crRNA 3
	Family	82.27 - 100 % (98.4 %)	1644	59.4 %	97.1 %	667	48
	Trypanosomatidae
	Order	82.27 - 100 % (98.4 %)	1652	59.6 %	97.1 %	667	48
	Trypanosomatida
	Subclass	81.88 – 100 % (97.9 %)	1931	57.6 %	94.8 %	818	100
	Metakinetoplastia
	Class	81.88 – 100 % (97.3 %)	2051	55.1 %	90.3 %	920	199
	Kinetoplastea
	Phylum	69.72 – 100 % (91.7 %)	3330	34.0 %	55.8 %	2199	1477
	Euglenozoa
	Phylum Euglenozoa (excluded Kinetoplastea)	69.72 – 98.55 % (82.9 %)	1287	0.6 %	0.7 %	1279	1278
